# Supplementary material for: Efficient preparation of template immobilization-based boronate affinity surface-imprinted silica nanoparticles using poly(4-aminobenzyl alcohol) as an imprinting coating for glycoprotein recognition
Source: Royal Society of Chemistry journal article supplement (doi:10.1039/c8ay00632f), 2018-01-01
Supplement: c8ay00632f1.pdf [file c8ay00632f1.pdf]

## Supporting Information

### **Efficient preparation of template immobilization-based boronate affinity surface-imprinted silica nanoparticles using poly (4-aminobenzyl alcohol) as imprinting coating for glycoprotein recognition**

Daojin Li<sup>1,\*</sup>, Tianyong Tu<sup>2</sup>, Xiuyuan Wu<sup>1</sup>

<sup>1</sup>College of Chemistry and Chemical Engineering, and Henan Key Laboratory of Function-Oriented Porous Materials, Luoyang Normal University, Luoyang 471934, P. R. China

<sup>2</sup>College of Chemistry and Molecular Engineering, Zhengzhou University zhengzhou, CN.

*Corresponding author. E-mail: lidaojin7910@126.com.*

## Supporting Figures

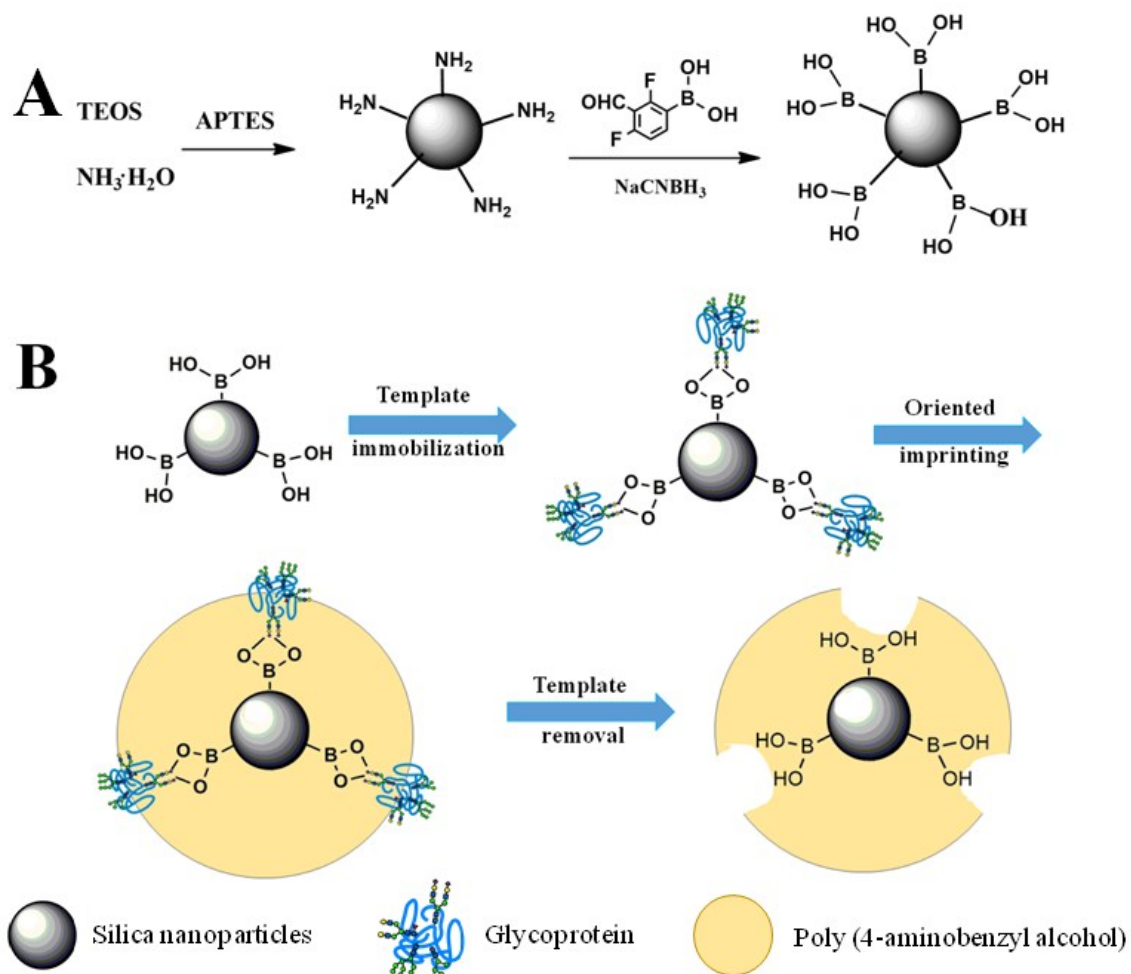

**Fig. S1** Synthesis routes of (A) DFFPBA-SNPs and (B) glycoprotein-imprinted SNPs..
